# Supplementary material
Source: ML conference proceedings conference paper supplement (https://proceedings.mlr.press/v119/ma20d.html)
Supplement: Supplementary file [file ma20d-supp.pdf]

# Quadratically Regularized Subgradient Methods for Weakly Convex Optimization with Weakly Convex Constraints Supplementary Materials

## 1. Appendix

In this section, we provide the proofs for the theoretical results in the paper.

### 1.1. Proof of Lemma 1

*Proof.* By KKT conditions, it holds that  $\lambda_t \geq 0$  and  $\lambda_t \left( g(\widehat{\mathbf{x}}_t) + \frac{\hat{\rho}}{2} \|\widehat{\mathbf{x}}_t - \mathbf{x}_t\|^2 \right) = 0$ . If  $\lambda_t = 0$ , there is nothing to show. So, we focus on the case that  $\lambda_t > 0$  and  $g(\widehat{\mathbf{x}}_t) + \frac{\hat{\rho}}{2} \|\widehat{\mathbf{x}}_t - \mathbf{x}_t\|^2 = 0$ . Note that  $\mathbf{x}_0$  is an  $\epsilon^2$ -feasible solution. Using the definitions of  $\mathcal{A}(\mathbf{x}_t, \hat{\rho}, \hat{\epsilon}, \delta/T)$  and  $\hat{\epsilon}$  and the union bound, we can show that the iterate  $\mathbf{x}_t$  generated by Algorithm 1 is an  $\epsilon^2$ -feasible solution for any  $t$  with a probability of at least  $1 - \delta$ .

Let  $\tilde{\mathbf{x}}_t \equiv \arg \min_{\mathbf{x} \in \mathcal{X}} \{g(\mathbf{x}) + \frac{\hat{\rho}}{2} \|\mathbf{x} - \mathbf{x}_t\|^2\}$ . According to Assumption 1B, the fact that  $\mathbf{x}_t$  is  $\epsilon^2$ -feasible, and the fact that  $\hat{\rho} \leq \rho + \rho_\epsilon$ , we have

$$-\sigma_\epsilon \geq \min_{\mathbf{x} \in \mathcal{X}} g(\mathbf{x}) + \frac{\rho + \rho_\epsilon}{2} \|\mathbf{x} - \mathbf{x}_t\|^2 \geq \min_{\mathbf{x} \in \mathcal{X}} g(\mathbf{x}) + \frac{\hat{\rho}}{2} \|\mathbf{x} - \mathbf{x}_t\|^2 = g(\tilde{\mathbf{x}}_t) + \frac{\hat{\rho}}{2} \|\tilde{\mathbf{x}}_t - \mathbf{x}_t\|^2. \quad (1)$$

As a result, the Lagrangian multiplier  $\lambda_t$  is well-defined and satisfies the optimality condition below together with  $\widehat{\mathbf{x}}_t$ :

$$\mathbf{0} \in \partial f(\widehat{\mathbf{x}}_t) + \hat{\rho}(\widehat{\mathbf{x}}_t - \mathbf{x}_t) + \lambda_t(\partial g(\widehat{\mathbf{x}}_t) + \hat{\rho}(\widehat{\mathbf{x}}_t - \mathbf{x}_t)) + \widehat{\zeta}_t, \quad (2)$$

for some  $\widehat{\zeta}_t \in \mathcal{N}_{\mathcal{X}}(\widehat{\mathbf{x}}_t)$ .

Since  $g(\mathbf{x}) + \frac{\hat{\rho}}{2} \|\mathbf{x} - \mathbf{x}_t\|^2 + \mathbf{1}_{\mathcal{X}}(\mathbf{x})$  is  $(\hat{\rho} - \rho)$ -strongly convex in  $\mathbf{x}$  and  $\frac{\widehat{\zeta}_t}{\lambda_t} \in \mathcal{N}_{\mathcal{X}}(\widehat{\mathbf{x}}_t) = \partial \mathbf{1}_{\mathcal{X}}(\widehat{\mathbf{x}}_t)$ , we have

$$\begin{aligned} g(\widehat{\mathbf{x}}_t) + \frac{\hat{\rho}}{2} \|\widehat{\mathbf{x}}_t - \mathbf{x}_t\|^2 &\geq g(\widehat{\mathbf{x}}_t) + \frac{\hat{\rho}}{2} \|\widehat{\mathbf{x}}_t - \mathbf{x}_t\|^2 + \langle \partial g(\widehat{\mathbf{x}}_t) + \hat{\rho}(\widehat{\mathbf{x}}_t - \mathbf{x}_t) + \frac{\widehat{\zeta}_t}{\lambda_t}, \widehat{\mathbf{x}}_t - \widehat{\mathbf{x}}_t \rangle + \frac{\hat{\rho} - \rho}{2} \|\widehat{\mathbf{x}}_t - \widehat{\mathbf{x}}_t\|^2 \\ &= \langle \partial g(\widehat{\mathbf{x}}_t) + \hat{\rho}(\widehat{\mathbf{x}}_t - \mathbf{x}_t) + \widehat{\zeta}_t/\lambda_t, \widehat{\mathbf{x}}_t - \widehat{\mathbf{x}}_t \rangle + \frac{\hat{\rho} - \rho}{2} \|\widehat{\mathbf{x}}_t - \widehat{\mathbf{x}}_t\|^2. \end{aligned}$$

Applying (1) to the inequality above and arranging terms give

$$\begin{aligned} -\sigma_\epsilon - \frac{(\hat{\rho} - \rho) \|\widehat{\mathbf{x}}_t - \widehat{\mathbf{x}}_t\|^2}{2} &\geq \langle \partial g(\widehat{\mathbf{x}}_t) + \hat{\rho}(\widehat{\mathbf{x}}_t - \mathbf{x}_t) + \widehat{\zeta}_t/\lambda_t, \widehat{\mathbf{x}}_t - \widehat{\mathbf{x}}_t \rangle \\ &\geq -\frac{\|\partial g(\widehat{\mathbf{x}}_t) + \hat{\rho}(\widehat{\mathbf{x}}_t - \mathbf{x}_t) + \widehat{\zeta}_t/\lambda_t\|^2}{2(\hat{\rho} - \rho)} - \frac{(\hat{\rho} - \rho) \|\widehat{\mathbf{x}}_t - \widehat{\mathbf{x}}_t\|^2}{2}, \end{aligned}$$

which implies  $\|\partial g(\widehat{\mathbf{x}}_t) + \hat{\rho}(\widehat{\mathbf{x}}_t - \mathbf{x}_t) + \widehat{\zeta}_t/\lambda_t\|^2 \geq 2\sigma_\epsilon(\hat{\rho} - \rho)$ .

Using this lower bound on  $\|\partial g(\widehat{\mathbf{x}}_t) + \hat{\rho}(\widehat{\mathbf{x}}_t - \mathbf{x}_t) + \widehat{\zeta}_t/\lambda_t\|^2$  and (2), we have that

$$\lambda_t = \frac{\|\partial f(\widehat{\mathbf{x}}_t) + \hat{\rho}(\widehat{\mathbf{x}}_t - \mathbf{x}_t)\|}{\|\partial g(\widehat{\mathbf{x}}_t) + \hat{\rho}(\widehat{\mathbf{x}}_t - \mathbf{x}_t) + \widehat{\zeta}_t/\lambda_t\|} \leq \frac{M + \hat{\rho}D}{\sqrt{2\sigma_\epsilon(\hat{\rho} - \rho)}}$$

for all  $t$  with a probability of at least  $1 - \delta$ , where we have used Assumption 1C and Assumption 1F in the inequality.  $\square$

## 1.2. Proof of Theorem 1

*Proof.* Since  $\mathbf{x}_{t+1} = \mathcal{A}(\mathbf{x}_t, \hat{\rho}, \hat{\epsilon}, \delta/T)$ , the definition of  $\mathcal{A}$  and the union bound imply that the following inequalities hold for  $t = 0, \dots, T-1$  with a probability of at least  $1 - \delta$ .

$$f(\mathbf{x}_{t+1}) + \frac{\hat{\rho}}{2} \|\mathbf{x}_{t+1} - \mathbf{x}_t\|^2 - f(\hat{\mathbf{x}}_t) - \frac{\hat{\rho}}{2} \|\hat{\mathbf{x}}_t - \mathbf{x}_t\|^2 \leq \hat{\epsilon}^2, \quad g(\mathbf{x}_{t+1}) + \frac{\hat{\rho}}{2} \|\mathbf{x}_{t+1} - \mathbf{x}_t\|^2 \leq \hat{\epsilon}^2. \quad (3)$$

Let  $\lambda_t$  be the optimal Lagrangian multiplier corresponding to  $\hat{\mathbf{x}}_t$ . Then  $\hat{\mathbf{x}}_t$  is also the optimal solution of the Lagrangian function  $\mathcal{L}(\mathbf{x}) \equiv f(\mathbf{x}) + \frac{\hat{\rho}}{2} \|\mathbf{x} - \mathbf{x}_t\|^2 + \lambda_t(g(\mathbf{x}) + \frac{\hat{\rho}}{2} \|\mathbf{x} - \mathbf{x}_t\|^2)$ . Since  $\mathcal{L}(\mathbf{x})$  is  $(1 + \lambda_t)(\hat{\rho} - \rho)$ -strongly convex, we have

$$\begin{aligned} \frac{(1 + \lambda_t)(\hat{\rho} - \rho)}{2} \|\mathbf{x}_t - \hat{\mathbf{x}}_t\|^2 &\leq f(\mathbf{x}_t) + \frac{\hat{\rho}}{2} \|\mathbf{x}_t - \mathbf{x}_t\|^2 + \lambda_t(g(\mathbf{x}_t) + \frac{\hat{\rho}}{2} \|\mathbf{x}_t - \mathbf{x}_t\|^2) \\ &\quad - \left[ f(\hat{\mathbf{x}}_t) + \frac{\hat{\rho}}{2} \|\hat{\mathbf{x}}_t - \mathbf{x}_t\|^2 + \lambda_t(g(\hat{\mathbf{x}}_t) + \frac{\hat{\rho}}{2} \|\hat{\mathbf{x}}_t - \mathbf{x}_t\|^2) \right] \\ &= f(\mathbf{x}_t) - f(\hat{\mathbf{x}}_t) + \lambda_t g(\mathbf{x}_t) - \frac{\hat{\rho}}{2} \|\hat{\mathbf{x}}_t - \mathbf{x}_t\|^2, \end{aligned} \quad (4)$$

where we use the complementary slackness, i.e.,  $\lambda_t(g(\hat{\mathbf{x}}_t) + \frac{\hat{\rho}}{2} \|\hat{\mathbf{x}}_t - \mathbf{x}_t\|^2) = 0$  in the equality above. Organizing the terms in the first inequality of (3), we get

$$\begin{aligned} f(\mathbf{x}_{t+1}) &\leq f(\hat{\mathbf{x}}_t) + \hat{\epsilon}^2 + \frac{\hat{\rho}}{2} \|\hat{\mathbf{x}}_t - \mathbf{x}_t\|^2 - \frac{\hat{\rho}}{2} \|\mathbf{x}_{t+1} - \mathbf{x}_t\|^2 \\ &\leq f(\hat{\mathbf{x}}_t) + \hat{\epsilon}^2 + f(\mathbf{x}_t) - f(\hat{\mathbf{x}}_t) + \lambda_t g(\mathbf{x}_t) - \frac{(1 + \lambda_t)(\hat{\rho} - \rho)}{2} \|\mathbf{x}_t - \hat{\mathbf{x}}_t\|^2 \\ &= f(\mathbf{x}_t) + \lambda_t g(\mathbf{x}_t) - \frac{(1 + \lambda_t)(\hat{\rho} - \rho)}{2} \|\mathbf{x}_t - \hat{\mathbf{x}}_t\|^2 + \hat{\epsilon}^2 \end{aligned}$$

where second inequality is because of (4). The inequality above can be written as

$$\frac{(1 + \lambda_t)(\hat{\rho} - \rho)}{2} \|\mathbf{x}_t - \hat{\mathbf{x}}_t\|^2 \leq f(\mathbf{x}_t) - f(\mathbf{x}_{t+1}) + \lambda_t g(\mathbf{x}_t) + \hat{\epsilon}^2 \quad (5)$$

Summing up inequality (5) from  $t = 0, 1, \dots, T-1$ , we have

$$\sum_{t=0}^{T-1} \frac{(1 + \lambda_t)(\hat{\rho} - \rho)}{2} \|\mathbf{x}_t - \hat{\mathbf{x}}_t\|^2 \leq f(\mathbf{x}_0) - f_{\text{lb}} + \sum_{t=0}^{T-1} \lambda_t g(\mathbf{x}_t) + T\hat{\epsilon}^2,$$

where  $f_{\text{lb}}$  is introduced in Assumption 1D. Note that  $g(\mathbf{x}_t) \leq g(\mathbf{x}_t) + \frac{\hat{\rho}}{2} \|\mathbf{x}_t - \mathbf{x}_{t-1}\|^2 \leq \hat{\epsilon}^2$  because of the property of  $\mathcal{A}$ . So we have

$$\sum_{t=0}^{T-1} \frac{(\hat{\rho} - \rho)}{2} \|\mathbf{x}_t - \hat{\mathbf{x}}_t\|^2 \leq \sum_{t=0}^{T-1} \frac{(1 + \lambda_t)(\hat{\rho} - \rho)}{2} \|\mathbf{x}_t - \hat{\mathbf{x}}_t\|^2 \leq f(\mathbf{x}_0) - f_{\text{lb}} + \sum_{t=0}^{T-1} \lambda_t \hat{\epsilon}^2 + T\hat{\epsilon}^2.$$

Dividing both sides by  $T(\hat{\rho} - \rho)/2$ , we have

$$\begin{aligned} \mathbb{E}_R \|\mathbf{x}_R - \hat{\mathbf{x}}_R\|^2 &= \frac{1}{T} \sum_{t=0}^{T-1} \|\mathbf{x}_t - \hat{\mathbf{x}}_t\|^2 \leq \frac{2(f(\mathbf{x}_0) - f_{\text{lb}})}{T(\hat{\rho} - \rho)} + \frac{2}{T(\hat{\rho} - \rho)} \sum_{t=0}^{T-1} (1 + \lambda_t) \hat{\epsilon}^2 \\ &\leq \frac{2(f(\mathbf{x}_0) - f_{\text{lb}})}{T(\hat{\rho} - \rho)} + \frac{2\hat{\epsilon}^2}{(\hat{\rho} - \rho)} \left( \frac{M + \hat{\rho}D}{\sqrt{2}\sigma_\epsilon(\hat{\rho} - \rho)} + 1 \right) \\ &\leq \frac{\hat{\epsilon}^2}{2} + \frac{\hat{\epsilon}^2}{2} = \hat{\epsilon}^2 \end{aligned}$$

with a probability of at least  $1 - \delta$ , where the second inequality is by Lemma 1 and the last inequality follows the definitions of  $T$  and  $\hat{\epsilon}$ .  $\square$

### 1.3. Proof of Theorem 2

*Proof.* For simplicity of notation, we defined  $\mu := \hat{\rho} - \rho$ . Let  $J := \{0, 1, \dots, K-1\} \setminus I$  where  $I$  is generated in Algorithm 2 when it terminates.

Suppose  $k \in I$ , namely,  $G(\mathbf{z}_k) \leq \hat{\epsilon}^2$  is satisfied in iteration  $k$ . Algorithm 2 will update  $\mathbf{z}_{k+1}$  using  $F'(\mathbf{z}_k)$ . Following the standard analysis of subgradient decent method, we can get

$$\begin{aligned} F(\mathbf{z}_k) - F(\hat{\mathbf{x}}_t) &\leq \gamma_k(M^2 + \hat{\rho}^2 D^2) + \left(\frac{1}{2\gamma_k} - \frac{\mu}{2}\right) \|\mathbf{z}_k - \hat{\mathbf{x}}_t\|^2 - \frac{\|\mathbf{z}_{k+1} - \hat{\mathbf{x}}_t\|^2}{2\gamma_k} \\ &= \frac{2(M^2 + \hat{\rho}^2 D^2)}{\mu(k+2)} + \left(\frac{\mu(k+2)}{4} - \frac{2\mu}{4}\right) \|\mathbf{z}_k - \hat{\mathbf{x}}_t\|^2 - \frac{\mu(k+2)}{4} \|\mathbf{z}_{k+1} - \hat{\mathbf{x}}_t\|^2 \\ &= \frac{2(M^2 + \hat{\rho}^2 D^2)}{\mu(k+2)} + \frac{\mu k}{4} \|\mathbf{z}_k - \hat{\mathbf{x}}_t\|^2 - \frac{\mu(k+2)}{4} \|\mathbf{z}_{k+1} - \hat{\mathbf{x}}_t\|^2 \end{aligned} \quad (6)$$

Multiplying  $k+1$  to the both sides of 6, we can get

$$\begin{aligned} (k+1)(F(\mathbf{z}_k) - F(\hat{\mathbf{x}}_t)) &\leq \frac{2(M^2 + \hat{\rho}^2 D^2)(k+1)}{\mu(k+2)} + \frac{\mu k(k+1)}{4} \|\mathbf{z}_k - \hat{\mathbf{x}}_t\|^2 - \frac{\mu(k+1)(k+2)}{4} \|\mathbf{z}_{k+1} - \hat{\mathbf{x}}_t\|^2 \\ &\leq \frac{2(M^2 + \hat{\rho}^2 D^2)}{\mu} + \frac{\mu k(k+1)}{4} \|\mathbf{z}_k - \hat{\mathbf{x}}_t\|^2 - \frac{\mu(k+1)(k+2)}{4} \|\mathbf{z}_{k+1} - \hat{\mathbf{x}}_t\|^2 \end{aligned} \quad (7)$$

Suppose  $k \in J$ , namely,  $G(\mathbf{z}_k) \leq \hat{\epsilon}^2$  is not satisfied in iteration  $k$ . Algorithm 2 will update  $\mathbf{z}_{k+1}$  using  $G'(\mathbf{z}_k)$ . Similarly, we can get

$$(k+1)(G(\mathbf{z}_k) - G(\hat{\mathbf{x}}_t)) \leq \frac{2(M^2 + \hat{\rho}^2 D^2)}{\mu} + \frac{\mu k(k+1)}{4} \|\mathbf{z}_k - \hat{\mathbf{x}}_t\|^2 - \frac{\mu(k+1)(k+2)}{4} \|\mathbf{z}_{k+1} - \hat{\mathbf{x}}_t\|^2 \quad (8)$$

Summing up inequalities (7) and (8) from  $k = 0, \dots, K-1$  and dropping the non-negative terms, we obtain

$$\sum_{k \in I} (k+1)(F(\mathbf{z}_k) - F(\hat{\mathbf{x}}_t)) + \sum_{k \in J} (k+1)(G(\mathbf{z}_k) - G(\hat{\mathbf{x}}_t)) \leq \frac{2K(M^2 + \hat{\rho}^2 D^2)}{\mu} \quad (9)$$

Because  $G(\mathbf{z}_k) > \hat{\epsilon}^2$  when  $k \in J$  and  $G(\hat{\mathbf{x}}_t) \leq 0$ , the inequality above implies

$$\sum_{k \in I} (k+1)(F(\mathbf{z}_k) - F(\hat{\mathbf{x}}_t)) + \sum_{k \in J} (k+1)\hat{\epsilon}^2 \leq \frac{2K(M^2 + \hat{\rho}^2 D^2)}{\mu} \quad (10)$$

Rearranging terms gives

$$\begin{aligned} \sum_{k \in I} (k+1)(F(\mathbf{z}_k) - F(\hat{\mathbf{x}}_t)) &\leq \sum_{k \in I} (k+1)\hat{\epsilon}^2 - \sum_{k=0}^{K-1} (k+1)\hat{\epsilon}^2 + \frac{2K(M^2 + \hat{\rho}^2 D^2)}{\mu} \\ &\leq \sum_{k \in I} (k+1)\hat{\epsilon}^2 - \frac{K(K+1)}{2}\hat{\epsilon}^2 + \frac{2K(M^2 + \hat{\rho}^2 D^2)}{\mu}. \end{aligned}$$

Given that  $K \geq \frac{4(M^2 + \hat{\rho}^2 D^2)}{\mu\hat{\epsilon}^2}$ , the summation of the last two terms in the inequality above is non-positive. As a result, we have

$$\sum_{k \in I} (k+1)(F(\mathbf{z}_k) - F(\hat{\mathbf{x}}_t)) \leq \sum_{k \in I} (k+1)\hat{\epsilon}^2$$

Dividing both sides by  $\sum_{k \in I} (k+1)$  and using the convexity of  $F$ , we obtain  $F(\mathbf{x}_{t+1}) - F(\hat{\mathbf{x}}_t) \leq \hat{\epsilon}^2$ . As the same time, the convexity of  $G$  ensures  $G(\mathbf{x}_{t+1}) \leq \frac{\sum_{k \in I} (k+1)G(\mathbf{z}_k)}{\sum_{k \in I} (k+1)} \leq \hat{\epsilon}^2$ .

Hence, Algorithm 2 can be used as an oracle to solve (9) and the complexity of Algorithm 1 will be

$$TK = O\left(\frac{(f(\mathbf{x}_0) - f_{\text{lb}})(M^2 + \hat{\rho}^2 D^2)}{\epsilon^4(\hat{\rho} - \rho)^3} \left(\frac{M + \hat{\rho}D}{\sqrt{\sigma_\epsilon(\hat{\rho} - \rho)}} + 1\right)\right).$$

Note that, Algorithm 2 is deterministic so that the complexity above does not depend on  $\delta$ .  $\square$

#### 1.4. Proof of Theorem 3

*Proof.* According to Assumption 1B and the factor that  $\mathbf{x}_t$  is  $\epsilon^2$ -feasible with a high probability, Assumption 2 (The Slater's condition) in (Yu et al., 2017) holds for the subproblem (9) with a high probability. According to Theorem 4 in (Yu et al., 2017), Algorithm 3 guarantees

$$F(\mathbf{x}_{t+1}) - F(\hat{\mathbf{x}}_t) \leq \mathcal{B}_1(D, \tilde{M}_0, \tilde{M}_1, m, \sigma_\epsilon, K, \delta) \quad (11)$$

with a probability of at least  $1 - \delta$ , where

$$\begin{aligned} & \mathcal{B}_1(D, \tilde{M}_0, \tilde{M}_1, m, \sigma_\epsilon, K, \delta) \\ \equiv & \frac{D^2 + \tilde{M}_1^2/4 + (\tilde{M}_0 + \sqrt{m}\tilde{M}_1D)^2/2 + \log^{0.5}(\frac{1}{\delta})\tilde{M}_0\Lambda(D, \tilde{M}_0, \tilde{M}_1, m, \sigma_\epsilon, K, \delta)}{\sqrt{K}}, \end{aligned} \quad (12)$$

$$\begin{aligned} \Lambda(D, \tilde{M}_0, \tilde{M}_1, m, \sigma_\epsilon, K, \delta) \equiv & \frac{\sigma_\epsilon}{2} + (\tilde{M}_0 + \sqrt{m}\tilde{M}_1D) + \frac{2D^2}{\sigma_\epsilon} + \frac{2\tilde{M}_1D + (\tilde{M}_0 + \sqrt{m}\tilde{M}_1D)^2}{\sigma_\epsilon} \\ & + \tilde{\Lambda}(D, \tilde{M}_0, \tilde{M}_1, m, \sigma_\epsilon, K, \delta) + \frac{8(\tilde{M}_0 + \sqrt{m}\tilde{M}_1D)^2}{\sigma_\epsilon} \log\left(\frac{2K}{\delta}\right) = O(\log(K/\delta)), \end{aligned} \quad (13)$$

and

$$\tilde{\Lambda}(D, \tilde{M}_0, \tilde{M}_1, m, \sigma_\epsilon, K, \delta) \equiv \frac{8(\tilde{M}_0 + \sqrt{m}\tilde{M}_1D)^2}{\sigma_\epsilon} \log\left[1 + \frac{32(\tilde{M}_0 + \sqrt{m}\tilde{M}_1D)^2}{\sigma_\epsilon^2} \exp\left(\frac{\sigma_\epsilon}{8(\tilde{M}_0 + \sqrt{m}\tilde{M}_1D)}\right)\right].$$

According to equation (22) in (Yu et al., 2017), Algorithm 3 guarantees

$$F_i(\mathbf{x}_{t+1}) \leq \frac{\|(Q_K^1, Q_K^2, \dots, Q_K^m)\|}{K} + \frac{\tilde{M}_1^2}{\sqrt{K}} + \frac{\sqrt{m}\tilde{M}_1^2}{2K^2} \sum_{k=0}^{K-1} \|(Q_k^1, Q_k^2, \dots, Q_k^m)\| \quad (14)$$

for  $i = 1, \dots, m$ . It is also shown in Theorem 3 in (Yu et al., 2017) that

$$\|(Q_k^1, Q_k^2, \dots, Q_k^m)\| \leq \sqrt{K}\Lambda(D, \tilde{M}_0, \tilde{M}_1, m, \sigma_\epsilon, K, \delta) \quad (15)$$

for  $k = 0, 1, \dots, K$  with a probability of at least  $1 - \delta$ . Applying (15) to (14) and organizing terms, we obtain

$$F_i(\mathbf{x}_{t+1}) \leq \mathcal{B}_2(D, \tilde{M}_0, \tilde{M}_1, m, \sigma_\epsilon, K, \delta) \quad (16)$$

with a probability of at least  $1 - \delta$ , where

$$\begin{aligned} & \mathcal{B}_2(D, \tilde{M}_0, \tilde{M}_1, m, \sigma_\epsilon, K, \delta) \\ \equiv & \frac{\Lambda(D, \tilde{M}_0, \tilde{M}_1, m, \sigma_\epsilon, K, \delta) + \tilde{M}_1^2 + \Lambda(D, \tilde{M}_0, \tilde{M}_1, m, \sigma_\epsilon, K, \delta)\sqrt{m}\tilde{M}_1^2/2}{\sqrt{K}} \end{aligned} \quad (17)$$

To ensure Algorithm 3 is an oracle for (9), it suffices to choose the  $K$  large enough so that the left hand sides of (11) and (16) are both no more than  $\epsilon^2$ . Because  $\Lambda(D, \tilde{M}_0, \tilde{M}_1, m, \sigma_\epsilon, K, \delta) = O(\log(K/\delta))$ . It suffices to choose  $K = \tilde{O}(\frac{1}{\epsilon^4} \log(\frac{1}{\delta}))$ . Hence, Algorithm 3 can be used as an oracle to solve (9) and the complexity of Algorithm 1 will be

$$TK = \tilde{O}\left(\frac{1}{\epsilon^6}\right).$$

□

## References

Yu, H., Neely, M., and Wei, X. Online convex optimization with stochastic constraints. In *Advances in Neural Information Processing Systems*, pp. 1428–1438, 2017.
